# Supplementary material for: Safety, Effectiveness, and Pharmacokinetics of Crisaborole in Infants Aged 3 to < 24 Months with Mild-to-Moderate Atopic Dermatitis: A Phase IV Open-Label Study (CrisADe CARE 1)
Source: Springer Nature journal article supplement (doi:10.1007/s40257-020-00510-6), 2020-03-24
Supplement: MOESM1 [file 17827502]

**Safety, Effectiveness, and Pharmacokinetics of Crisaborole in Infants Aged 3 to  
<24 Months with Mild-to-Moderate Atopic Dermatitis: A Phase IV Open-Label Study  
(CrisADe CARE 1)**

American Journal Of Clinical Dermatology

Joel Schlessinger,<sup>1</sup> Julie S. Shepard,<sup>2</sup> Richard Gower,<sup>3</sup> John C. Su,<sup>4,5</sup> Charles Lynde,<sup>6</sup> Amy Cha,<sup>7</sup>  
William C. Ports,<sup>8,a</sup> Vivek Purohit,<sup>8</sup> Liza Takiya,<sup>9</sup> John L. Werth,<sup>10</sup> Chuanbo Zang,<sup>11</sup> Bonnie  
Vlahos<sup>12</sup>; on behalf of the CARE 1 Investigators

<sup>1</sup>Advanced Skin Research Center, Omaha, NE, USA; <sup>2</sup>Ohio Pediatric Research Association, Dayton, OH, USA; <sup>3</sup>Marycliff Clinical Research, Spokane, WA, USA; <sup>4</sup>Departments of Paediatrics, Murdoch Children's Research Institute, University of Melbourne, Melbourne, VIC, Australia; <sup>5</sup>Department of Dermatology, Monash University, Eastern Health, Melbourne, VIC, Australia; <sup>6</sup>Department of Medicine, Lynde Institute for Dermatology, Markham, ON, Canada; <sup>7</sup>Pfizer Inc., New York, NY, USA; <sup>8</sup>Global Product Development, Pfizer Inc., Groton, CT, USA; <sup>9</sup>Medical Affairs, Pfizer Inc., Collegeville, PA, USA; <sup>10</sup>Clinical Development and Operations, Pfizer Inc., Collegeville, PA, USA; <sup>11</sup>Biostatistics, Pfizer Inc., Collegeville, PA, USA; <sup>12</sup>Global Clinical Development, Pfizer Inc., Collegeville, PA, USA

<sup>a</sup>At the time of this study.

Author for correspondence: Joel Schlessinger, MD; [skindoc@lovelyskin.com](mailto:skindoc@lovelyskin.com)

**Supplemental Table 1.** Outcome measure descriptions

| Measure     | Description                                                                                                                                                                                                                                                                                                                                                                                                                                                                                                          |
|-------------|----------------------------------------------------------------------------------------------------------------------------------------------------------------------------------------------------------------------------------------------------------------------------------------------------------------------------------------------------------------------------------------------------------------------------------------------------------------------------------------------------------------------|
| ISGA [1]    | A 5-point global static assessment that considers presence/amount of erythema, induration/papulation, and oozing/crusting scored on a 5-point scale (0 = clear; 1 = almost clear; 2 = mild; 3 = moderate; 4 = severe)                                                                                                                                                                                                                                                                                                |
| EASI [2, 3] | <ul style="list-style-type: none"><li>• A composite score of the degree of erythema, induration/papulation, excoriation, and lichenification (4-point scale: 0 = absent; 1 = mild; 2 = moderate; 3 = severe) for each of four body regions, with adjustment for the %BSA involved for each body region, excluding the scalp, and for the proportion of the body region to the whole body</li><li>• In the current study, body regions were proportion-adjusted for subjects aged <math>\leq 7</math> years</li></ul> |
| %BSA        | Percentage of a patient's total body surface area that is AD involved, excluding the scalp                                                                                                                                                                                                                                                                                                                                                                                                                           |
| POEM [4]    | <ul style="list-style-type: none"><li>• 5-point scale measuring the frequency of each of seven AD symptoms (dryness, itching, flaking, cracking, sleep loss, bleeding, and weeping) over the past week scored as occurring "no days" (0), "1 to 2 days" (1), "3 to 4 days" (2), "5 to 6 days" (3) or "every day" (4)</li><li>• Total score ranges from 0–28, with higher score indicating greater symptom impact</li></ul>                                                                                           |

|  |                                                                                                                                                                                             |
|--|---------------------------------------------------------------------------------------------------------------------------------------------------------------------------------------------|
|  | <ul style="list-style-type: none"><li>• The proxy version of POEM used in this study was validated for completion by parents or caregivers of patients aged 12 months to 69 years</li></ul> |
|--|---------------------------------------------------------------------------------------------------------------------------------------------------------------------------------------------|

*%BSA* percentage of treatable body surface area; *AD* atopic dermatitis; *EASI* Eczema Area and Severity Index; *ISGA* Investigator's Static Global Assessment; *POEM* Patient-Oriented Eczema Measure.

**Supplemental Table 2.** Propylene glycol concentration (ng/mL)

|                | Overall population          | PK cohort              | Overall population                 |
|----------------|-----------------------------|------------------------|------------------------------------|
| Analysis visit | Screening<br><i>N</i> = 135 | Day 8<br><i>N</i> = 19 | End of treatment<br><i>N</i> = 119 |
| Mean (SD)      | 2838.84 (5099.61)           | 1380.26 (1737.1)       | 3906.54 (6828.21)                  |
| Median         | 1020 (0–30000)              | 916 (138–8130)         | 1190 (0–44000)                     |

*SD* standard deviation.

Unplanned postbaseline visits were excluded.

The lower limit of quantification was 100 ng/mL. Summary statistics were calculated by setting concentration values below the lower limit of quantification to 0.

**Supplemental Fig. 1** CONSORT diagram.

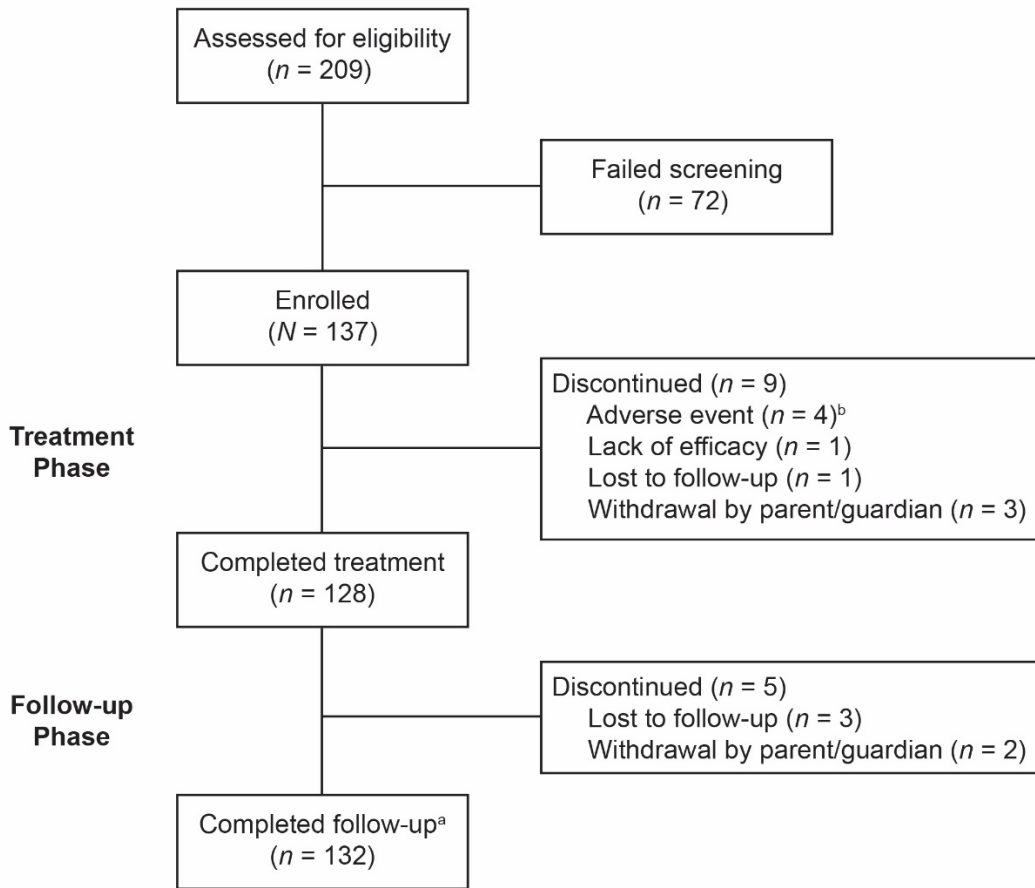

<sup>a</sup>Four patients who discontinued treatment during the treatment phase remained in the study and completed the follow-up phase.

<sup>b</sup>Adverse events leading to discontinuation of study drug were “febrile convulsion” (not related to treatment), “dermatitis infected” (not related to treatment), “application site pain” (treatment-related), and “application site discomfort” (treatment-related).

**Supplemental Fig. 2** Mean change from baseline in %BSA with crisaborole.

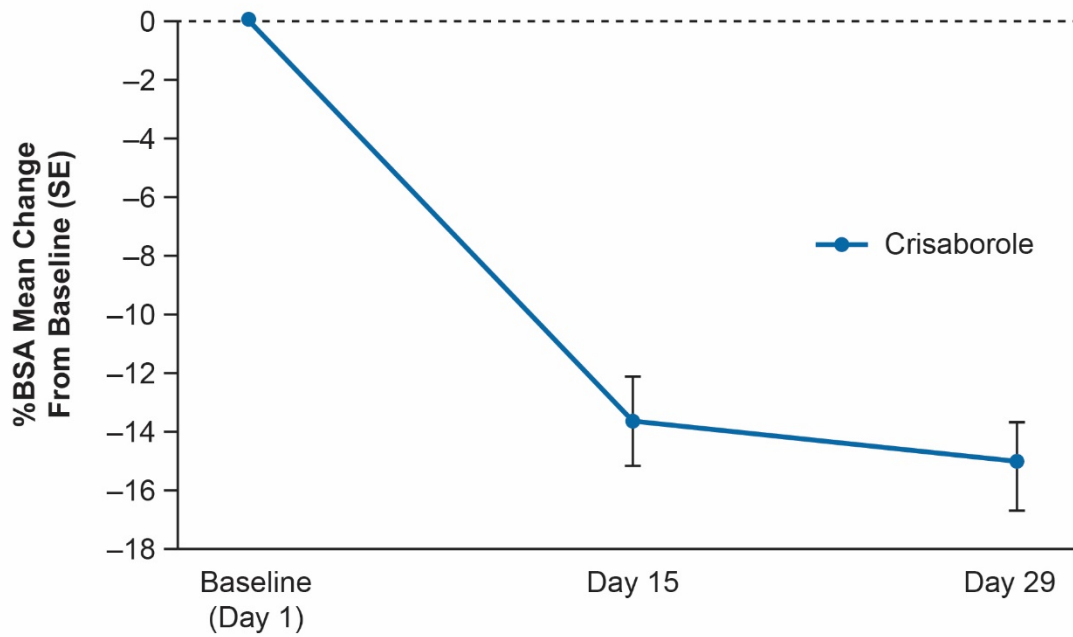

| Analysis Visit   | n   | Mean (SE)     | Mean Change From Baseline (SE) |
|------------------|-----|---------------|--------------------------------|
| Baseline (Day 1) | 137 | 28.12 (1.879) | —                              |
| Day 15           | 137 | 14.51 (1.149) | -13.61 (1.497)                 |
| Day 29           | 130 | 12.40 (1.181) | -15.24 (1.509)                 |

%BSA percentage of treatable body surface area; SE standard error

## References

1. Paller AS, Tom WL, Lebwohl MG, Blumenthal RL, Boguniewicz M, Call RS, et al. Efficacy and safety of crisaborole ointment, a novel, nonsteroidal phosphodiesterase 4 (PDE4) inhibitor for the topical treatment of atopic dermatitis (AD) in children and adults. *J Am Acad Dermatol.* 2016;75(3):494-503.e6.
2. Bissonnette R, Papp KA, Poulin Y, Gooderham M, Raman M, Mallbris L, et al. Topical tofacitinib for atopic dermatitis: a phase IIa randomized trial. *Br J Dermatol.* 2016;175(5):902-11.
3. Barbier N, Paul C, Luger T, Allen R, De Prost Y, Papp K, et al. Validation of the Eczema Area and Severity Index for atopic dermatitis in a cohort of 1550 patients from the pimecrolimus cream 1% randomized controlled clinical trials programme. *Br J Dermatol.* 2004;150(1):96-102.
4. Charman CR, Venn AJ, Williams HC. The patient-oriented eczema measure: development and initial validation of a new tool for measuring atopic eczema severity from the patients' perspective. *Arch Dermatol.* 2004;140(12):1513-9.
